# Supplementary material for: Seven-coordinate LnIII complexes assembled from a bulky MesacacH ligand: their synthesis, structure, photoluminescence and SMM behaviour
Source: Royal Society of Chemistry journal article supplement (doi:10.1039/d0dt03054f), 2020-01-01
Supplement: d0dt03054f1.pdf [file d0dt03054f1.pdf]

## *Supporting Information*

### **Seven-coordinate Ln<sup>III</sup> Complexes Assembled from a Bulky <sup>Mes</sup>acacH Ligand: Synthesis, Structure, Photoluminescence and SMM behaviour**

*Pankaj Kalita,<sup>a,b</sup> Prakash Nayak,<sup>a</sup> Naushad Ahmed,<sup>b</sup> Juan Manuel Herrera,<sup>c</sup> Krishnan Venkatasubbaiah,<sup>a\*</sup> Enrique Colacio,<sup>c\*</sup> and Vadapalli Chandrasekhar<sup>\*b,d</sup>*

<sup>a</sup>School of Chemical Sciences, National Institute of Science Education and Research Bhubaneswar, HBNI, Jatni, Khurda - 752050, Odisha, India

<sup>b</sup>Tata Institute of Fundamental Research Hyderabad, Gopanpally, Hyderabad-500 046, India

<sup>c</sup>Departamento de Química Inorgánica, Facultad de Ciencias, Universidad de Granada, Avenida de Fuentenueva s/n, 18071 Granada, Spain

<sup>d</sup>Department of Chemistry, Indian Institute of Technology Kanpur, Kanpur-208016, India

AUTHOR EMAIL ADDRESSES: [vc@iitk.ac.in](mailto:vc@iitk.ac.in); [vc@tifrh.res.in](mailto:vc@tifrh.res.in); [krishv@niser.ac.in](mailto:krishv@niser.ac.in)  
[ecolacio@ugr.es](mailto:ecolacio@ugr.es)

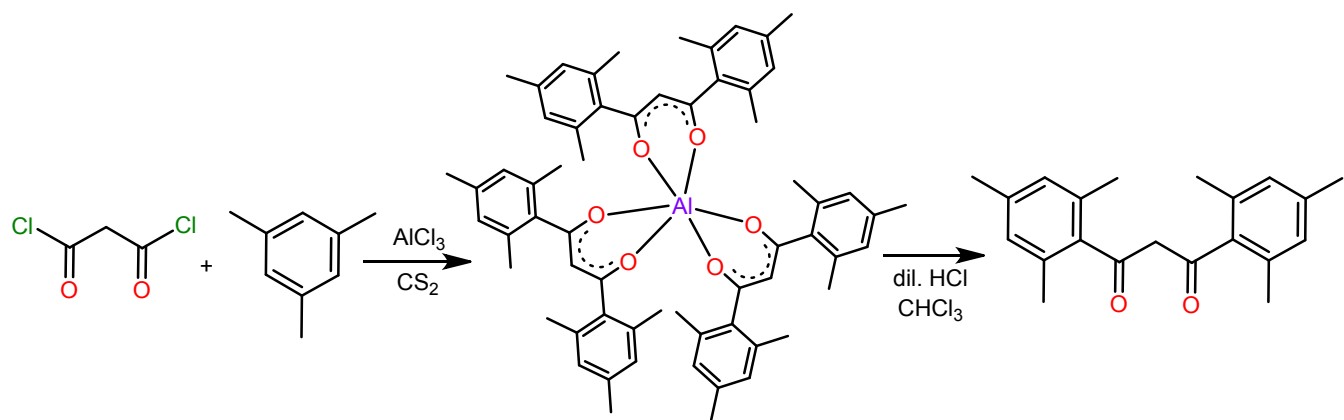

**Scheme S1.** Synthetic reaction scheme for the preparation of <sup>Mes</sup>Acac ligand.

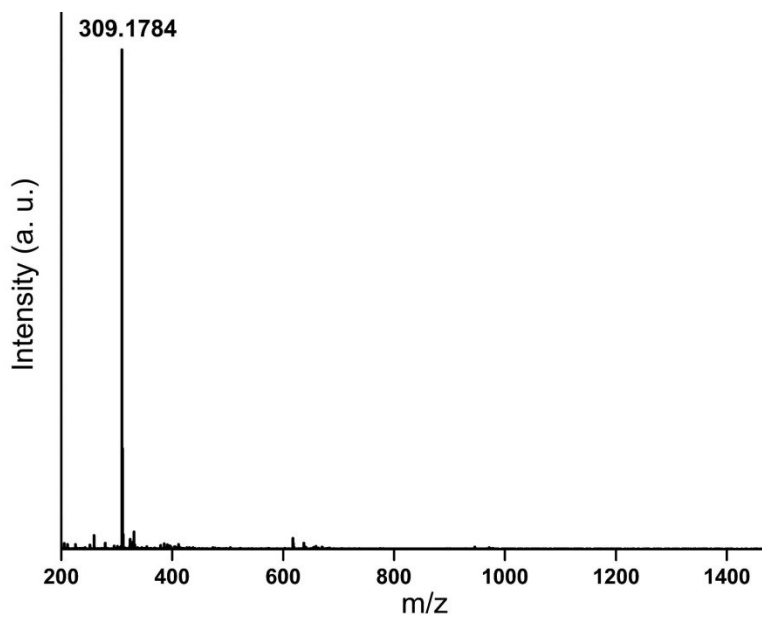

**Fig. S1.** ESI-MS of <sup>Mes</sup>Acac ligand

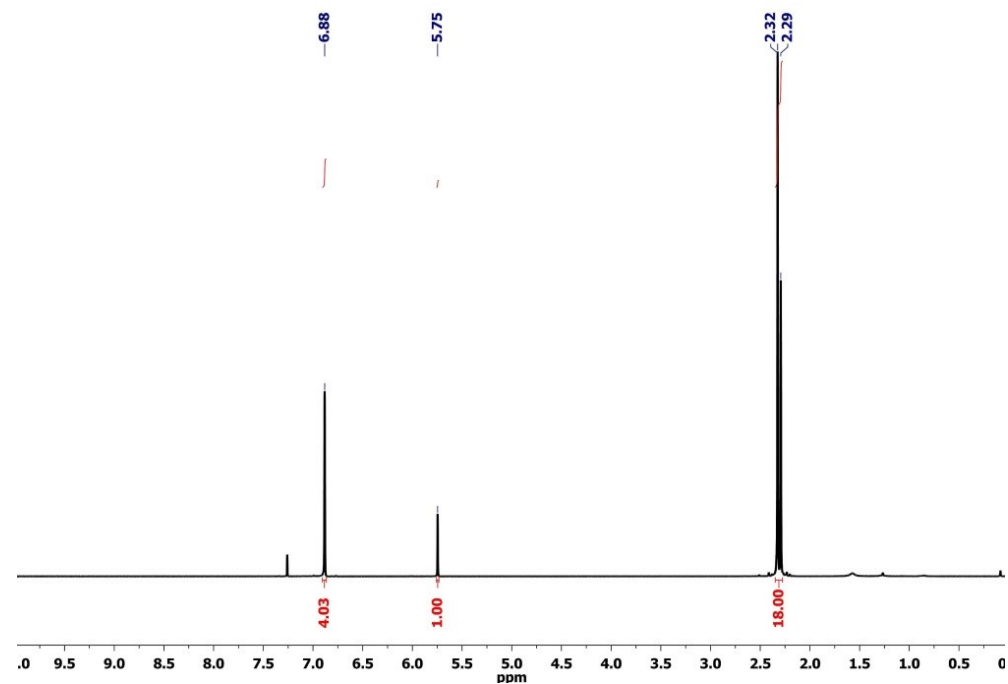

**Fig. S2.**  $^1\text{H}$  nmr spectra of *Mes* Acac. (The signal at 7.26 is due to the residual solvent)

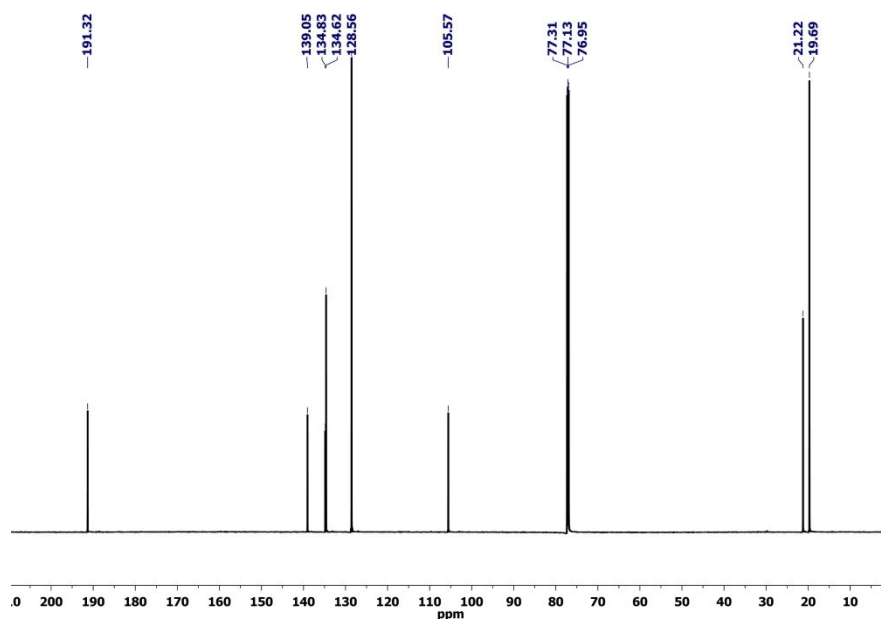

**Fig. S3.**  $^{13}\text{C}\{^1\text{H}\}$  nmr spectra of *Mes* Acac. (The signals at 76-77 are due to the residual solvent)

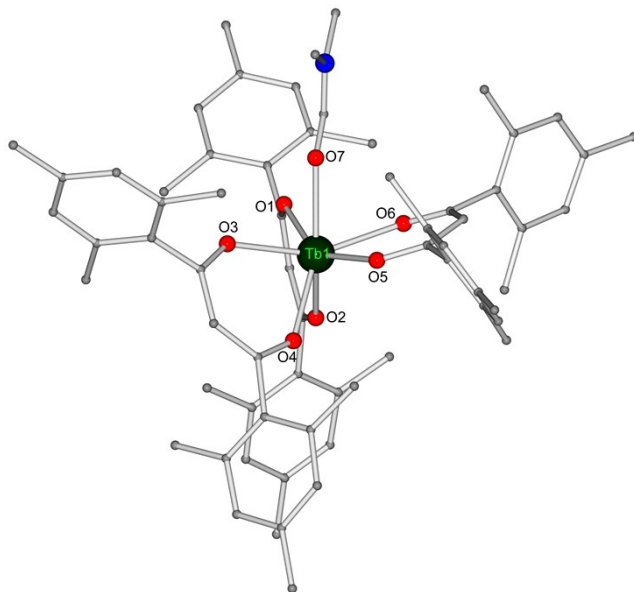

**Fig. S4.** (*top*) Molecular structure of complex **2**; (*bottom*) piano stool coordination geometry around the Tb<sup>III</sup> centre. Colour codes: C = grey; N = blue; O = red; Tb = olive green (H atoms are omitted for clarity).

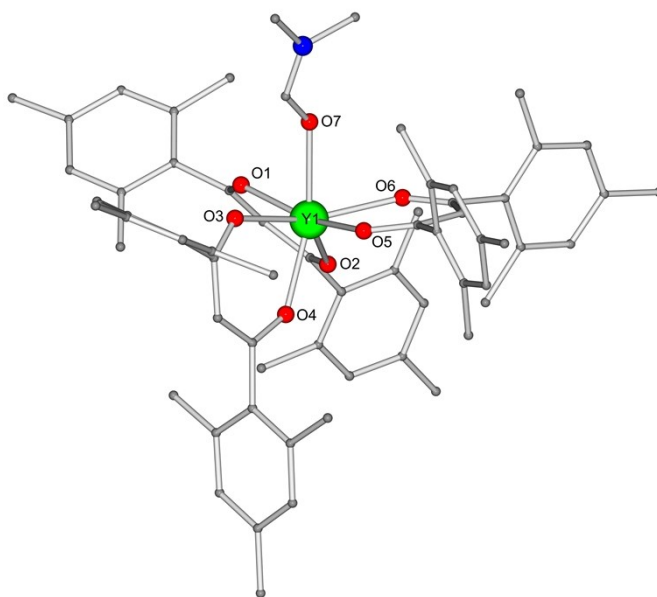

**Fig. S5.** (*top*) Molecular structure of complex **3**; (*bottom*) piano stool coordination geometry around the (Y<sub>0.91</sub>/Dy<sub>0.09</sub>)<sup>III</sup> centre. Colour codes: C = grey; N = blue; O = red; Y<sub>0.09</sub>Dy<sub>0.91</sub> = bright green (H atoms are omitted for clarity).

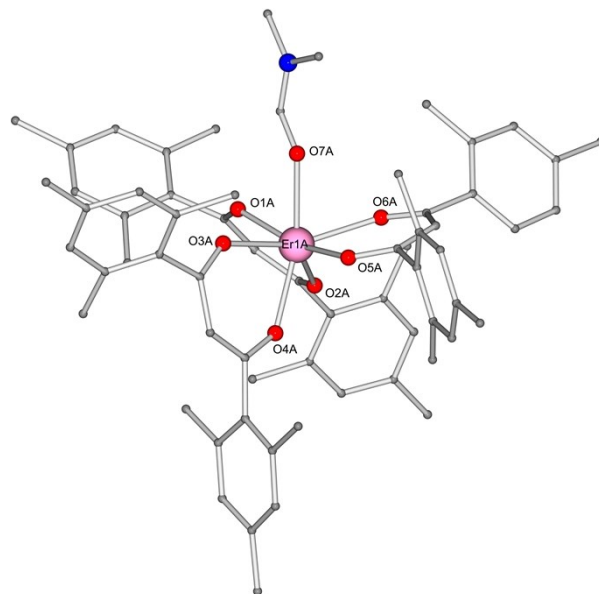

**Fig. S6.** (*top*) Molecular structure of complex **4**; (*bottom*) piano stool coordination geometry around the Er<sup>III</sup> centre. Colour codes: C = grey; N = blue; O = red; Er = plum (H atoms are omitted for clarity)

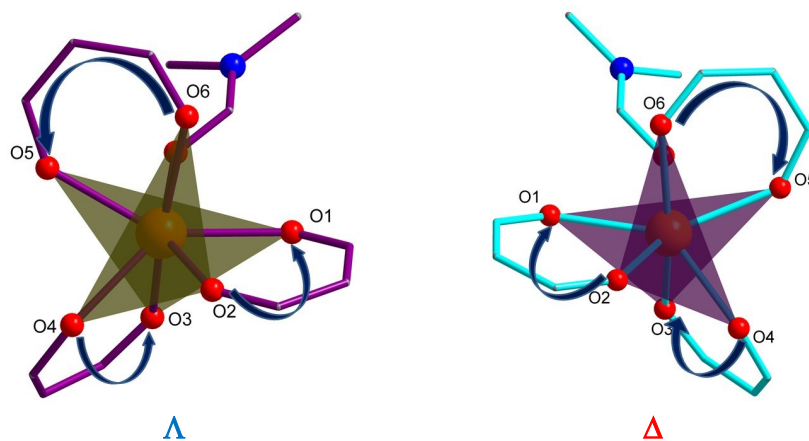

**Fig. S7.**  $\Delta$  and  $\Lambda$  isomers of complex **1** (only the core view is shown for clarity and the coordinating DMF molecule is ignored in assigning the helicity of the isomers).

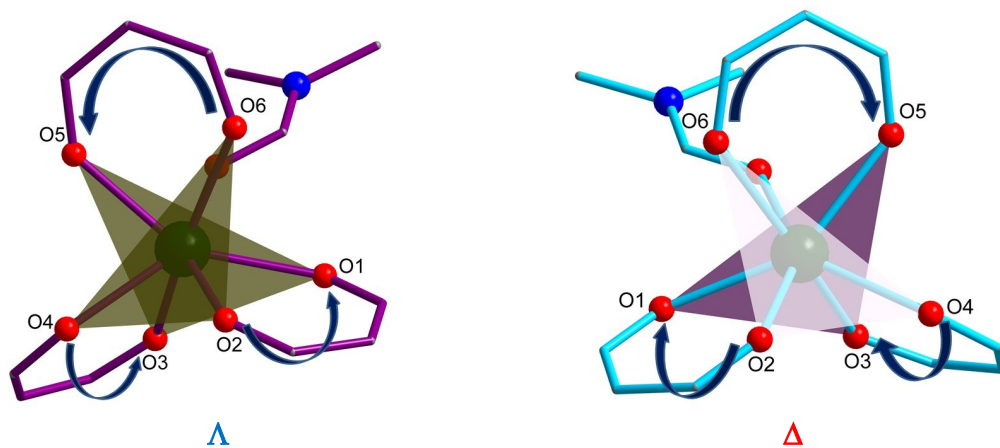

**Fig. S8.**  $\Lambda$  and  $\Delta$  isomers of complex **2** (only the core view is shown for clarity and the coordinating DMF molecule is ignored in assigning the helicity of the isomers).

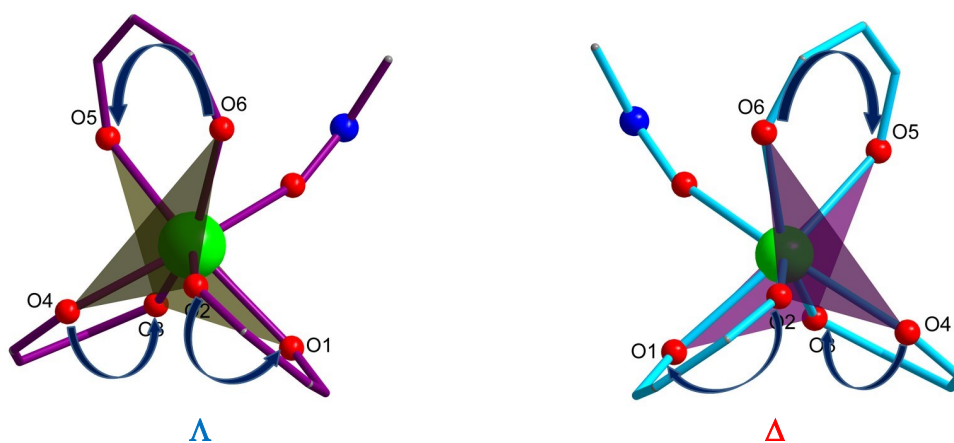

**Fig. S9.**  $\Lambda$  and  $\Delta$  isomers of complex **3** (only the core view is shown for clarity and the coordinating DMF molecule is ignored in assigning the helicity of the isomers).

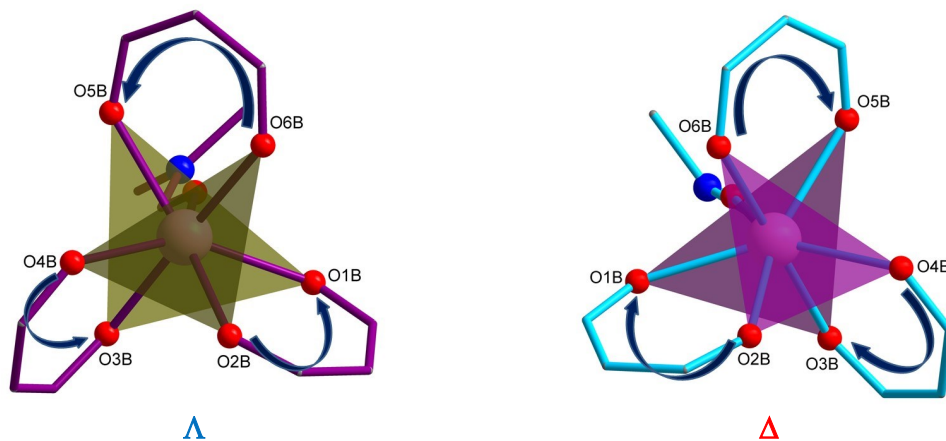

**Fig. S10.**  $\Lambda$  and  $\Delta$  isomers of complex **4** (only the core view is shown for clarity and the coordinating DMF molecule is ignored in assigning the helicity of the isomers).

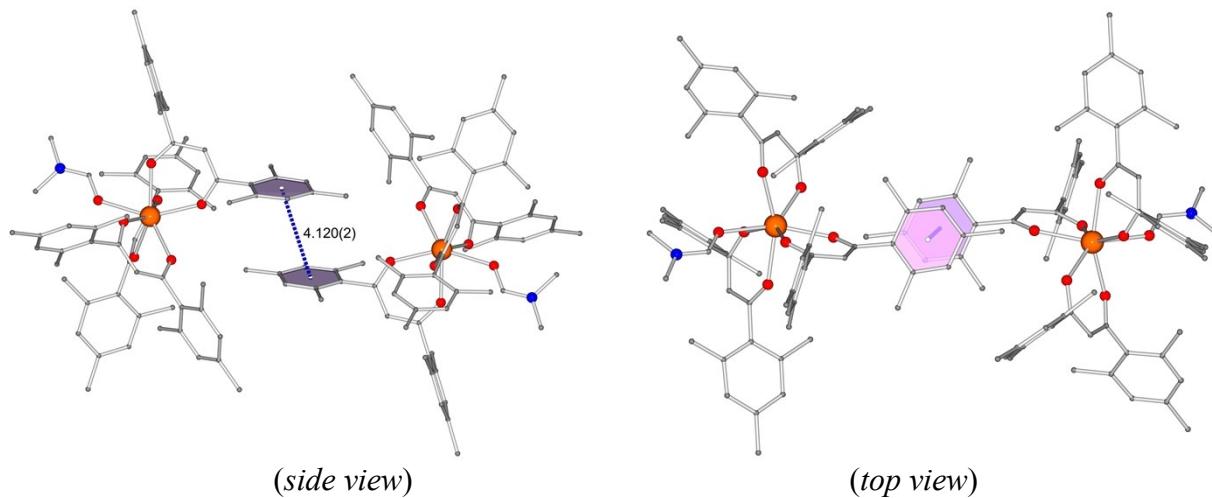

**Fig. S11.** Sandwich-type pi-pi stacking of mes rings, with the inversion center of the  $P-1$  unit cell being sited along the ring centroid vector of **1**. The centroid.....centroid distance between the two rings is 4.120(3) Å. (H atoms are omitted for clarity)

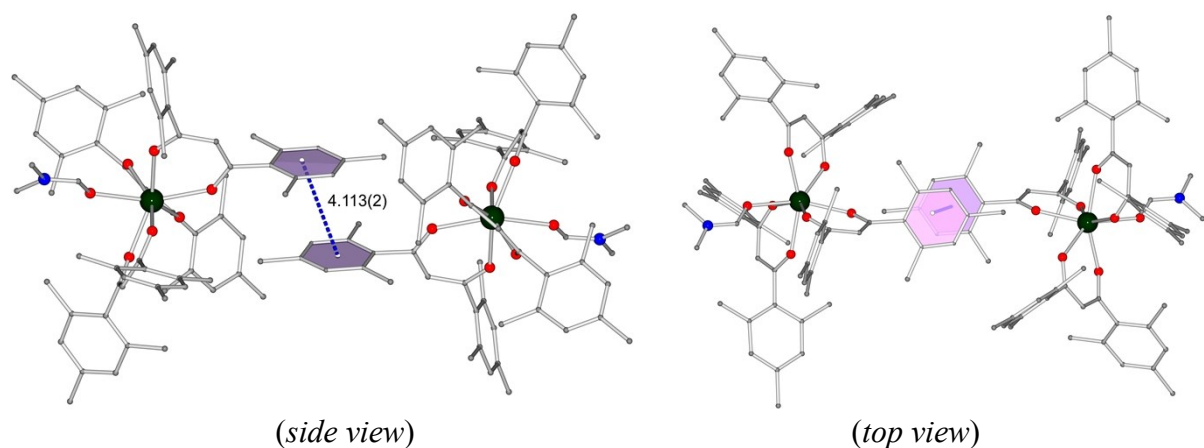

**Fig. S12.** Sandwich-type pi-pi stacking of mes rings, with the inversion center of the  $P-1$  unit cell being sited along the ring centroid vector of **1**. The centroid.....centroid distance between the two rings is 4.113(2) Å. (H atoms are omitted for clarity)

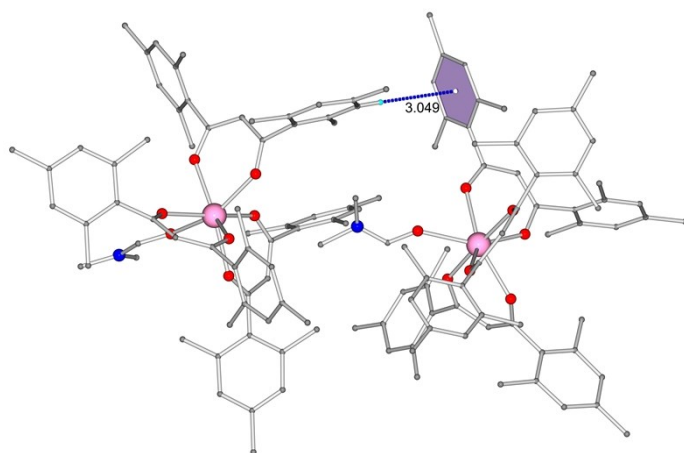

**Fig. S13.** Sandwich-type pi-pi stacking of mes rings, with the inversion center of the  $P-1$  unit cell being sited along the ring centroid vector of **1**. The centroid.....centroid distance between the two rings is 4.113(2) Å. (H atoms are omitted for clarity)



**Table S1.** The Continuous Shape Measures calculations using SHAPE program for different probable coordination geometries with C.N. 7 around the Ln(III) centre of **1–4**.

| Complex                                | Structure <sup>†</sup> |        |        |              |              |         |         |
|----------------------------------------|------------------------|--------|--------|--------------|--------------|---------|---------|
|                                        | HP-7                   | HPY-7  | PBPY-7 | COC-7        | CTPR-7       | JPBPY-7 | JETPY-7 |
| <b>1</b> _Dy<br>CShM                   | 33.207                 | 21.365 | 6.096  | <b>0.675</b> | 1.506        | 9.512   | 16.499  |
| <b>2</b> _Tb<br>CShM                   | 33.050                 | 21.423 | 6.185  | <b>0.712</b> | 1.533        | 9.626   | 16.300  |
| <b>3</b> _Dy<br>CShM                   | 33.906                 | 21.193 | 6.279  | <b>0.620</b> | 1.162        | 9.969   | 16.768  |
| <b>4</b> _Er1A<br>CShM<br>Er1B<br>CShM | 35.253                 | 19.894 | 5.631  | <b>0.646</b> | 1.604        | 9.321   | 19.036  |
|                                        | 36.145                 | 20.421 | 3.087  | 2.654        | <b>2.280</b> | 6.712   | 20.434  |

<sup>†</sup> HP-7 = Heptagon (*D*7h); HPY-7 = Hexagonal pyramid (*C*6v); PBPY-7 = Pentagonal bipyramid (*D*5h); COC-7 = Capped octahedron (*C*3v); CTPR-7 = Capped trigonal prism (*C*2v); JPBPY-7 = Johnson pentagonal bipyramid J13 (*D*5h); JETPY-7 = Johnson elongated triangular pyramid J7 (*C*3v)

**Table S2.** Selected bond lengths (Å) and bond angle (°) for the complex **2**, **3**, and **4**

| Complex with C.G.                                                                                                                                                 | Bond lengths (Å)    | Bond angles (°)     |
|-------------------------------------------------------------------------------------------------------------------------------------------------------------------|---------------------|---------------------|
| 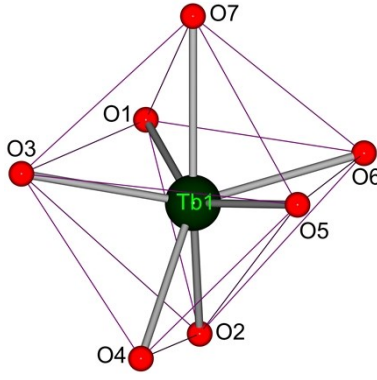 <p>Distorted capped octahedron geometry of <i>Tb1</i> in complex <b>2</b></p> | Tb1–O1 2.3082(12)   | O1–Tb1–O4 134.99(5) |
|                                                                                                                                                                   | Tb1–O2 2.2878(14)   | O1–Tb1–O6 82.11(5)  |
|                                                                                                                                                                   | Tb1–O3 2.2929(14)   | O1–Tb1–O7 76.94(5)  |
|                                                                                                                                                                   | Tb1–O4 2.3166(13)   | O2–Tb1–O1 74.22(5)  |
|                                                                                                                                                                   | Tb1–O5 2.2852(13)   | O2–Tb1–O3 112.02(6) |
|                                                                                                                                                                   | Tb1–O6 2.3200(15)   | O2–Tb1–O4 75.13(5)  |
|                                                                                                                                                                   | Tb1–O7 2.3959(14)   | O2–Tb1–O6 87.20(6)  |
|                                                                                                                                                                   |                     | O2–Tb1–O7 149.52(5) |
|                                                                                                                                                                   |                     | O3–Tb1–O1 88.37(5)  |
|                                                                                                                                                                   |                     | O3–Tb1–O4 73.62(5)  |
|                                                                                                                                                                   | O3–Tb1–O6 155.39(6) |                     |
|                                                                                                                                                                   | O3–Tb1–O7 76.53(6)  |                     |
|                                                                                                                                                                   | O4–Tb1–O6 128.18(5) |                     |
|                                                                                                                                                                   | O4–Tb1–O7 134.19(5) |                     |
|                                                                                                                                                                   | O5–Tb1–O1 148.64(5) |                     |
|                                                                                                                                                                   | O5–Tb1–O2 123.20(5) |                     |
|                                                                                                                                                                   | O5–Tb1–O3 105.35(5) |                     |
|                                                                                                                                                                   | O5–Tb1–O4 76.36(5)  |                     |
|                                                                                                                                                                   | O5–Tb1–O6 73.78(5)  |                     |
|                                                                                                                                                                   | O5–Tb1–O7 79.06(5)  |                     |
|                                                                                                                                                                   | O6–Tb1–O7 79.22(6)  |                     |
|                                                                                                                                                                   | O1–Y1–O2 73.96(7)   |                     |
|                                                                                                                                                                   | O1–Y1–O3 86.34(8)   |                     |

|                                                                                                                                                                   |                                                                                                                                                                                                       |                                                                                                                                                                                                                                                                                                                                                                                                                                                                                                                                                                                                                                                                                                            |
|-------------------------------------------------------------------------------------------------------------------------------------------------------------------|-------------------------------------------------------------------------------------------------------------------------------------------------------------------------------------------------------|------------------------------------------------------------------------------------------------------------------------------------------------------------------------------------------------------------------------------------------------------------------------------------------------------------------------------------------------------------------------------------------------------------------------------------------------------------------------------------------------------------------------------------------------------------------------------------------------------------------------------------------------------------------------------------------------------------|
| 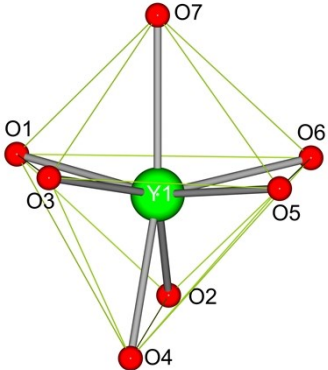 <p>Distorted capped octahedron geometry of <i>Y1</i> in complex <b>3</b></p>    | <p>Y1–O1      2.262(2)<br/> Y1–O2      2.306(2)<br/> Y1–O3      2.329(2)<br/> Y1–O4      2.255(2)<br/> Y1–O5      2.336(2)<br/> Y1–O6      2.270(2)<br/> Y1–O7      2.336(2)</p>                      | <p>O1–Y1–O5      160.02(7)<br/> O1–Y1–O6      113.79(8)<br/> O1–Y1–O7      81.63(8)<br/> O2–Y1–O3      138.03(7)<br/> O2–Y1–O5      125.87(7)<br/> O2–Y1–O7      132.75(8)<br/> O3–Y1–O5      79.27(7)<br/> O3–Y1–O7      77.96(7)<br/> O4–Y1–O1      105.38(8)<br/> O4–Y1–O2      75.07(8)<br/> O4–Y1–O3      75.09(7)<br/> O4–Y1–O5      84.34(8)<br/> O4–Y1–O6      118.07(8)<br/> O4–Y1–O7      151.55(8)<br/> O5–Y1–O7      81.87(8)<br/> O6–Y1–O2      72.30(8)<br/> O6–Y1–O3      149.07(8)<br/> O6–Y1–O5      74.78(7)<br/> O6–Y1–O7      81.95(8)</p>                                                                                                                                             |
|  <p>Distorted capped octahedron geometry of <i>Er1A</i> in complex <b>4</b></p> | <p>Er1A–O1A      2.256(2)<br/> Er1A–O2A      2.266(2)<br/> Er1A–O3A      2.260(2)<br/> Er1A–O4A      2.274(2)<br/> Er1A–O5A      2.278(2)<br/> Er1A–O6A      2.268(2)<br/> Er1A–O7A      2.335(2)</p> | <p>O1A–Er1A–O2A      73.63(8)<br/> O1A–Er1A–O3A      83.03(8)<br/> O1A–Er1A–O4A      109.60(9)<br/> O1A–Er1A–O5A      162.63(8)<br/> O1A–Er1A–O6A      107.65(9)<br/> O1A–Er1A–O7A      79.26(9)<br/> O2A–Er1A–O4A      76.59(8)<br/> O2A–Er1A–O5A      122.79(8)<br/> O2A–Er1A–O6A      73.89(9)<br/> O2A–Er1A–O7A      131.75(9)<br/> O3A–Er1A–O2A      133.47(8)<br/> O3A–Er1A–O4A      74.24(8)<br/> O3A–Er1A–O5A      87.80(8)<br/> O3A–Er1A–O6A      152.56(9)<br/> O3A–Er1A–O7A      79.95(8)<br/> O4A–Er1A–O5A      81.80(9)<br/> O4A–Er1A–O7A      151.18(9)<br/> O5A–Er1A–O7A      84.64(9)<br/> O6A–Er1A–O4A      122.54(9)<br/> O6A–Er1A–O5A      74.79(8)<br/> O6A–Er1A–O7A      77.49(9)</p> |
|                                                                                                                                                                   | <p>Er1B–O1B      2.304(2)<br/> Er1B–O2B      2.272(2)<br/> Er1B–O3B      2.252(2)<br/> Er1B–O4B      2.286(2)<br/> Er1B–O5B      2.297(2)<br/> Er1B–O6B      2.271(2)</p>                             | <p>O3B–Er1B–O1B      96.34(9)<br/> O3B–Er1B–O2B      91.21(9)<br/> O3B–Er1B–O4B      75.17(8)<br/> O3B–Er1B–O5B      107.78(9)<br/> O3B–Er1B–O6B      176.67(8)<br/> O3B–Er1B–O7B      77.8(4)<br/> O4B–Er1B–O1B      147.25(8)<br/> O4B–Er1B–O5B      76.37(8)<br/> O4B–Er1B–O7B      132.8(3)<br/> O5B–Er1B–O1B      135.53(8)<br/> O6B–Er1B–O1B      83.88(9)</p>                                                                                                                                                                                                                                                                                                                                       |

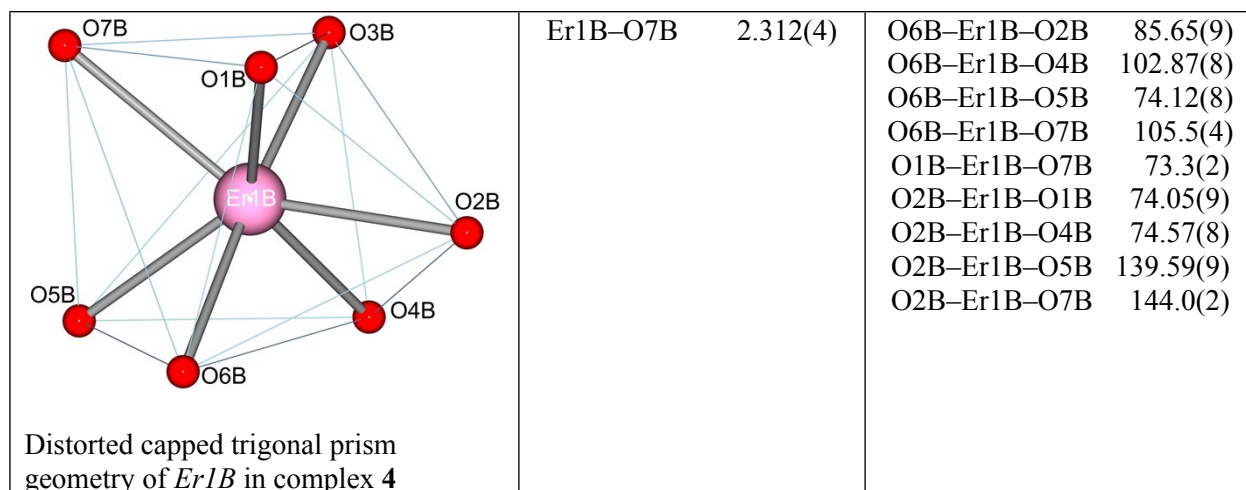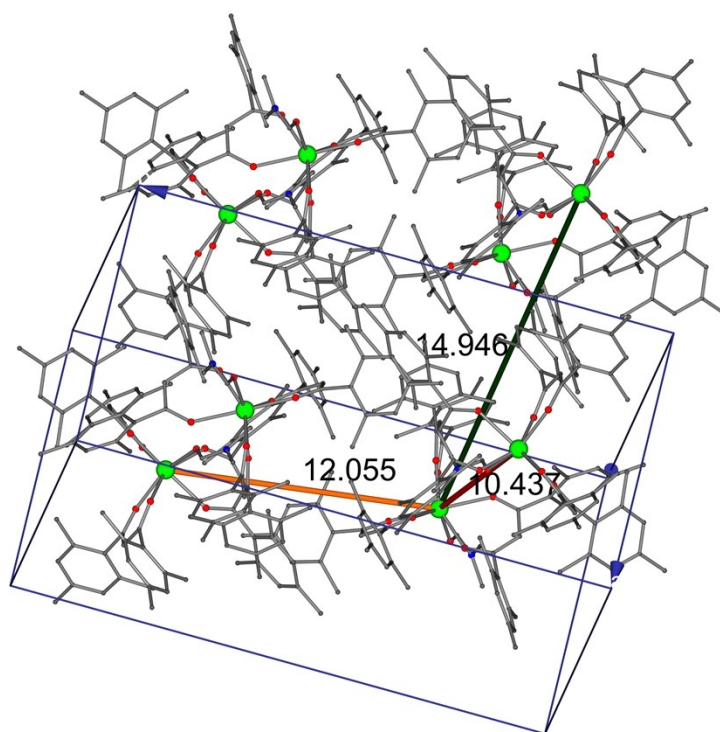

**Fig. S14.** Solid state packing diagram of complex 3 (viewed along the crystallographic *c* axis).

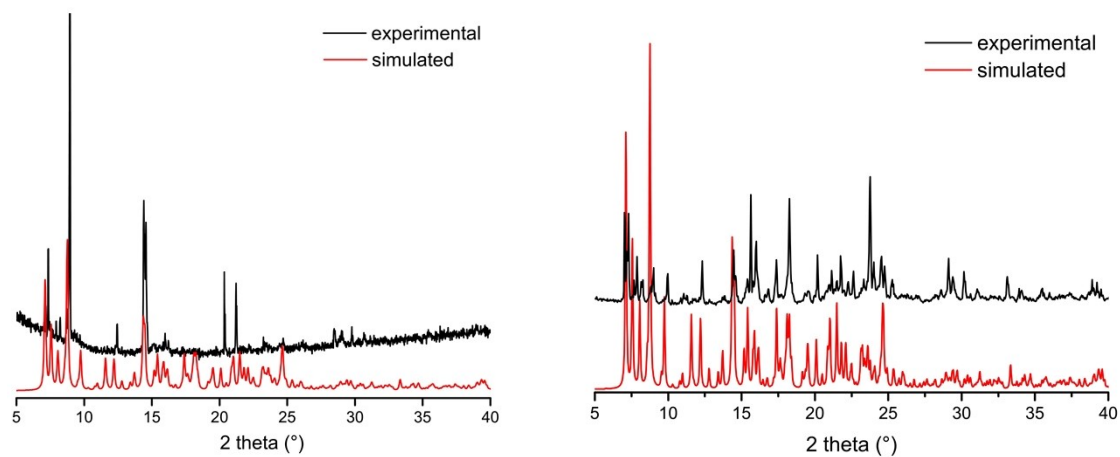

**Fig. S15.** The calculated and experimental PXRD pattern of complex **1** (*left*) and **3** (*right*).

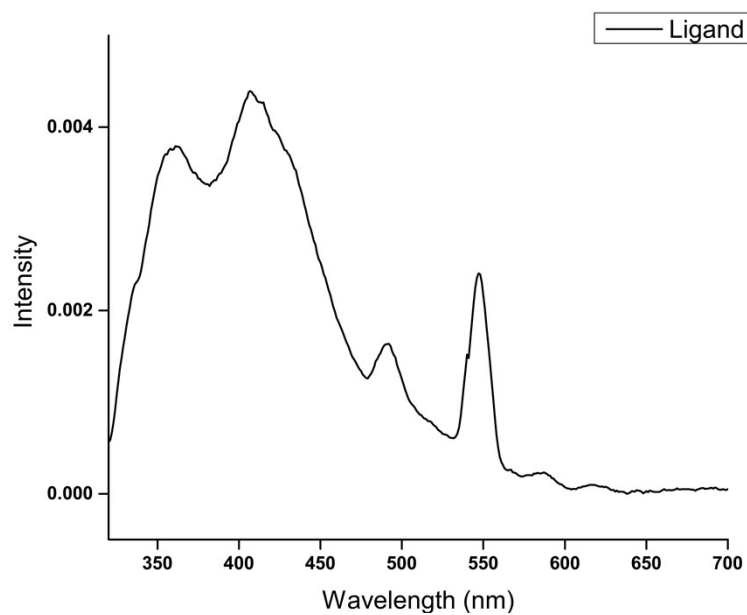

**Fig. S16.** Emission spectrum of *Mes*Acac.

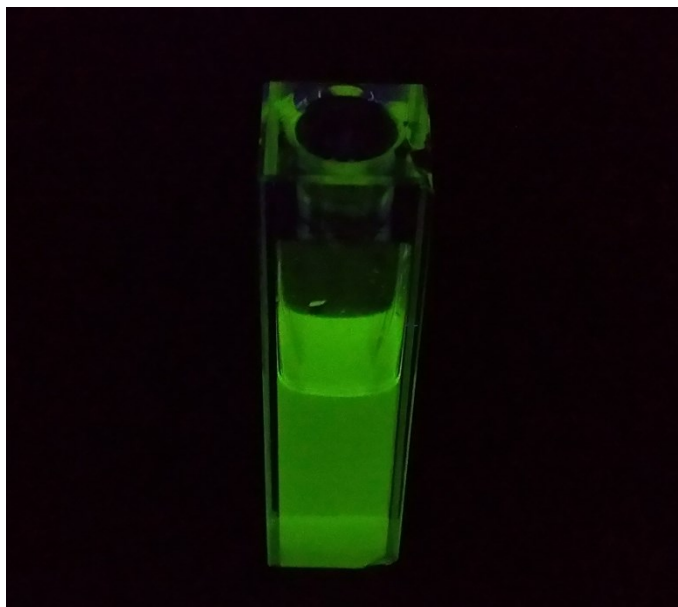

**Fig. S17.** Photographic image of complex **2** at  $5 \times 10^{-4}$  M concentration in DMF solution.

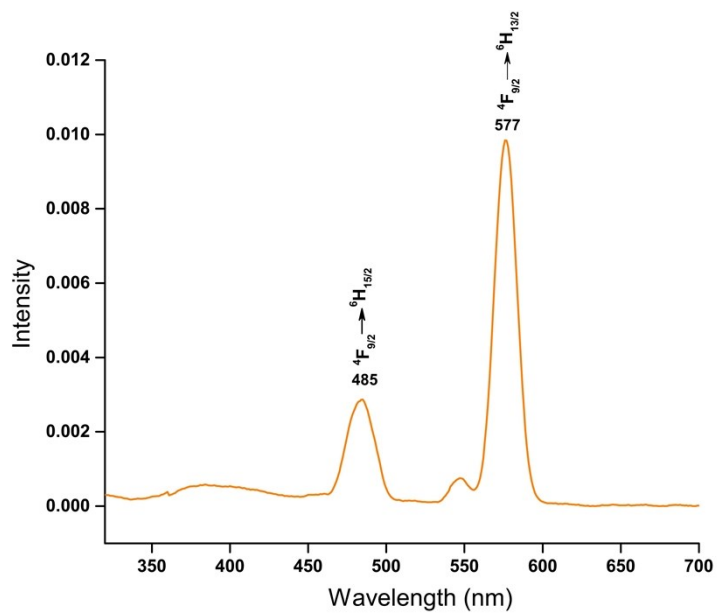

**Fig. S18.** Emission spectrum of the Dy<sup>(III)</sup> complex **1** (excitation at 305 nm; DMF solution  $5 \mu\text{M}$ ) at room temperature.

**Table S3.** Table of absolute quantum yield for **2**.

| Sl. No. | Complex       | Quantum Yield (%) |
|---------|---------------|-------------------|
| 1       | <b>2</b> (Tb) | 0.74              |

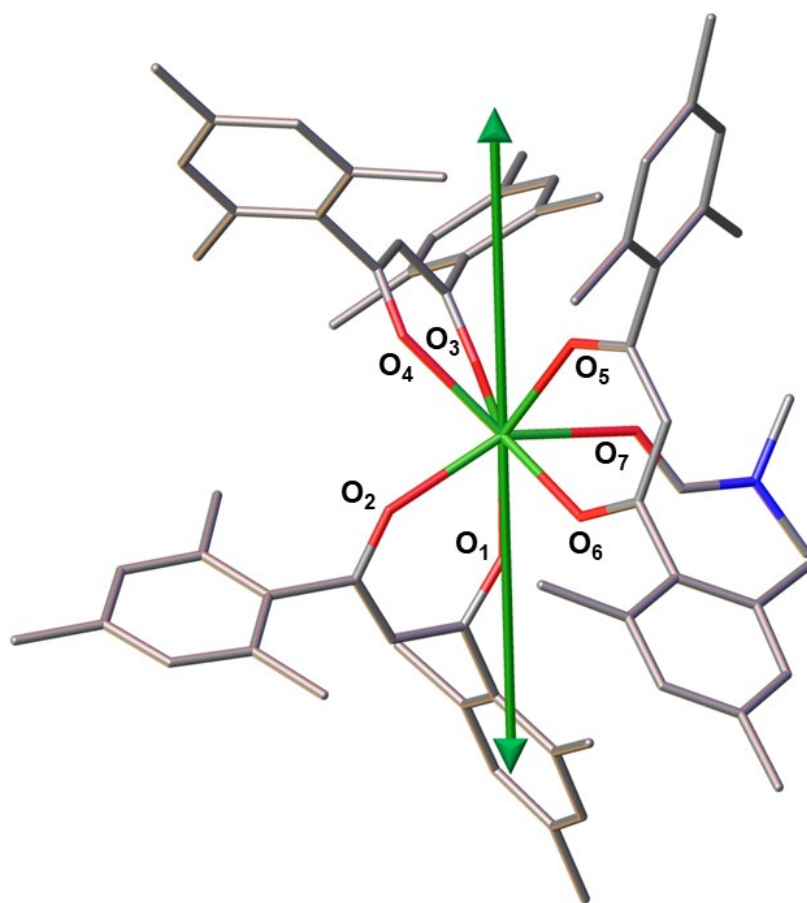

**Fig. S19.** Quantitative calculation of the anisotropic axes orientation (green arrows) using the electrostatic method by Chilton et al. (see ref. 26 in the manuscript).

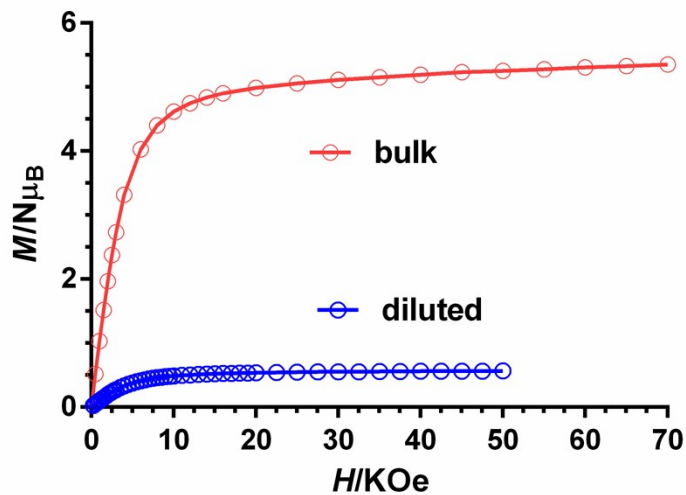

**Figure S20.** Field dependence of  $M$  for **1** and the diluted complex **3**.

**Table S4.** ANO-RCC basis set used in CASSCF calculation.

| Atoms      | Basis Set    |
|------------|--------------|
| H          | 2s           |
| C          | 2s1p         |
| N,O        | 3s2p1d       |
| Dy, Tb, Er | 8s7p5d3f2g1h |

**Table S5.** The CASSCF computed energy (cm<sup>-1</sup>) of the spin-free states for complex **1**. The red values represent the 21 sextets and grey values represent 224 quartets respectively for Dy<sup>III</sup> ion.

| Complex 1   |           |             |           |           |            |
|-------------|-----------|-------------|-----------|-----------|------------|
| 0.000       | 25342.355 | 31157.687   | 38148.891 | 58069.030 | 79418.264  |
| 15.55856    | 25351.802 | 31160.378   | 38168.497 | 62467.481 | 85851.169  |
| 45.28642    | 25380.092 | 31167.919   | 38176.391 | 62467.611 | 85862.922  |
| 78.86821    | 25396.904 | 31169.427   | 43421.787 | 62589.279 | 86084.497  |
| 186.55344   | 25432.250 | 31179.558   | 43630.428 | 62595.696 | 86160.404  |
| 264.61617   | 25450.717 | 31183.030   | 43738.776 | 62639.740 | 86215.378  |
| 332.84645   | 25470.445 | 31246.756   | 43754.146 | 62658.545 | 88657.121  |
| 441.18351   | 25487.650 | 31254.800   | 43853.919 | 62672.563 | 88658.469  |
| 467.79481   | 25507.216 | 31268.787   | 43897.968 | 62688.306 | 88775.715  |
| 590.46138   | 25522.610 | 31274.825   | 43939.519 | 62725.362 | 88797.629  |
| 591.91869   | 25542.218 | 31289.047   | 45160.469 | 62769.116 | 88866.704  |
| 7515.51808  | 25564.242 | 31312.230   | 45162.778 | 62780.316 | 88921.386  |
| 7659.77437  | 25575.154 | 31320.893   | 45233.613 | 62869.598 | 88935.376  |
| 7716.13326  | 25585.362 | 31331.638   | 45238.249 | 62874.807 | 88990.607  |
| 7732.62678  | 25667.226 | 31336.671   | 45279.337 | 62920.470 | 89013.614  |
| 7802.31217  | 25677.177 | 31344.543   | 45282.596 | 62922.226 | 89129.214  |
| 7833.96041  | 25696.934 | 31345.869   | 45328.348 | 67690.754 | 89151.905  |
| 7850.16642  | 25712.607 | 33016.404   | 45341.351 | 67982.918 | 89193.814  |
| 34829.88655 | 26395.397 | 33056.621   | 45389.438 | 68085.580 | 89206.218  |
| 34947.64347 | 26425.735 | 33108.970   | 45472.099 | 73475.570 | 99292.812  |
| 35264.04468 | 26440.723 | 33210.708   | 45494.529 | 73560.069 | 99316.984  |
| 24839.27404 | 26446.221 | 33232.624   | 45523.586 | 73654.617 | 99553.916  |
| 24858.97189 | 26463.654 | 34529.133   | 45535.872 | 73880.204 | 99618.202  |
| 24878.02668 | 26492.754 | 34549.720   | 57536.238 | 73902.854 | 99726.114  |
| 24886.30965 | 26524.685 | 34556.054   | 57541.648 | 77448.934 | 99743.573  |
| 24907.2168  | 26572.950 | 34601.343   | 57614.537 | 77593.666 | 99848.587  |
| 24932.23691 | 26587.143 | 34621.556   | 57642.479 | 77593.985 | 106643.283 |
| 24976.5642  | 29712.214 | 34632.076   | 57662.126 | 77617.572 | 106652.533 |
| 24991.91426 | 29721.368 | 34655.810   | 57684.850 | 77635.099 | 106747.752 |
| 25015.8326  | 29725.712 | 34687.544   | 57703.723 | 77644.791 | 106758.151 |
| 25039.03985 | 29745.837 | 34699.755   | 57723.934 | 77660.246 | 106783.391 |
| 25064.4199  | 29765.654 | 34707.713   | 57744.807 | 77661.543 | 106846.123 |
| 25120.96534 | 29779.549 | 34724.244   | 57756.131 | 77674.260 | 106920.876 |
| 25137.76173 | 29793.060 | 37618.281   | 57789.094 | 77685.547 | 106948.179 |
| 25207.21668 | 29805.728 | 37732.317   | 57798.808 | 77699.730 | 106986.056 |
| 25230.13641 | 29827.491 | 37775.069   | 57849.441 | 77704.780 |            |
| 25249.54675 | 29834.453 | 37825.767   | 57870.289 | 79066.482 |            |
| 25271.43495 | 29847.428 | 37910.443   | 57881.732 | 79151.987 |            |
| 25281.96096 | 29877.305 | 37974.181   | 57901.285 | 79184.945 |            |
| 25297.38344 | 29900.451 | 38003.48094 | 57920.985 | 79218.580 |            |
| 25307.48366 | 29933.530 | 38068.14036 | 57945.830 | 79261.768 |            |
| 25330.38364 | 29937.935 | 38114.21687 | 58066.859 | 79380.923 |            |



**Table S6.** The CASSCF computed energy (cm<sup>-1</sup>) of the spin-free states for complexes **2** and **4**. The red values represent the 7 septets (for Tb<sup>III</sup>) and 35 quartets (for Er<sup>III</sup>) respectively. The grey values represent the 140 quintet and 112 doublet states for Tb<sup>III</sup> and Er<sup>III</sup> respectively.

| Complex 2 |           |           |           | Complex 4 |           |           |            |
|-----------|-----------|-----------|-----------|-----------|-----------|-----------|------------|
| 0.000     | 35329.616 | 50108.364 | 77478.760 | 0.000     | 18188.440 | 43986.668 | 60811.836  |
| 81.517    | 35384.698 | 50118.691 | 77500.122 | 18.183    | 18192.869 | 44047.916 | 60821.991  |
| 143.623   | 35556.796 | 50138.342 | 77579.787 | 69.743    | 18209.839 | 44077.387 | 60852.404  |
| 358.825   | 35580.498 | 50168.851 | 77627.994 | 93.065    | 18212.927 | 44161.266 | 60875.775  |
| 390.676   | 35634.374 | 50211.922 | 77692.160 | 97.916    | 23961.534 | 44166.154 | 60898.112  |
| 584.504   | 35647.785 | 50246.885 | 77733.978 | 277.157   | 23981.478 | 44181.690 | 77160.300  |
| 874.672   | 35670.547 | 50262.087 | 77862.836 | 300.586   | 23993.185 | 44185.005 | 77166.581  |
| 25690.613 | 40253.355 | 50313.810 | 93110.063 | 311.816   | 24037.657 | 44592.246 | 77240.584  |
| 25716.971 | 40269.028 | 50317.048 | 93119.621 | 338.834   | 24081.378 | 44593.011 | 77272.169  |
| 25748.170 | 40292.000 | 51722.003 | 93371.955 | 414.557   | 24094.174 | 44746.734 | 77331.562  |
| 25836.217 | 40307.567 | 51761.360 | 93398.774 | 459.388   | 24103.327 | 44750.563 | 77345.340  |
| 25842.069 | 40346.142 | 51910.970 | 93534.694 | 493.567   | 24166.237 | 44851.532 | 77362.382  |
| 29189.036 | 40356.938 | 51996.806 | 93566.140 | 534.485   | 24170.099 | 44855.089 | 77388.482  |
| 29194.230 | 40382.143 | 52168.262 | 93644.391 | 18293.965 | 26977.041 | 44927.922 | 77403.118  |
| 29198.768 | 40393.170 | 54523.700 | 93735.312 | 18307.123 | 26977.358 | 44947.412 | 110373.741 |
| 29203.838 | 40428.723 | 54711.112 | 93747.410 | 18346.357 | 27115.168 | 45010.796 | 110392.142 |
| 29265.830 | 40454.884 | 54781.364 | 95163.574 | 18415.536 | 27124.451 | 45030.966 | 110634.187 |
| 29283.090 | 40494.759 | 57634.318 | 95172.801 | 18423.769 | 27144.539 | 45072.849 | 110768.095 |
| 29333.920 | 40501.546 | 57661.153 | 95446.178 | 18428.041 | 27155.224 | 45123.953 | 110853.804 |
| 29349.057 | 40519.644 | 57668.929 | 95498.545 | 18507.582 | 27208.756 | 45139.855 | 110884.692 |
| 29364.506 | 40557.680 | 57750.986 | 95571.140 | 18718.774 | 27222.741 | 45181.131 | 111009.068 |
| 29406.966 | 40590.443 | 57771.691 |           | 28514.003 | 27273.121 | 45188.478 |            |
| 29426.515 | 40601.554 | 57813.870 |           | 28569.331 | 27289.721 | 45207.555 |            |
| 29578.459 | 40635.353 | 57849.990 |           | 28617.101 | 27311.601 | 45209.895 |            |
| 29584.656 | 40679.999 | 57879.563 |           | 28842.643 | 27441.677 | 50180.459 |            |
| 29630.974 | 40739.012 | 57884.649 |           | 28875.573 | 27448.949 | 50186.423 |            |
| 29635.026 | 40745.360 | 57910.260 |           | 28941.952 | 27470.755 | 50228.883 |            |
| 29645.539 | 45743.154 | 57960.548 |           | 28964.647 | 27474.812 | 50232.931 |            |
| 29651.017 | 45755.793 | 68507.628 |           | 29001.292 | 33111.877 | 50253.040 |            |
| 30598.926 | 45771.318 | 75031.557 |           | 29046.637 | 33136.483 | 50270.566 |            |
| 30641.821 | 45811.833 | 75055.721 |           | 46627.195 | 33166.269 | 50273.442 |            |
| 30659.667 | 45846.109 | 75074.925 |           | 46900.377 | 33254.722 | 50285.706 |            |
| 30745.918 | 45866.801 | 75091.449 |           | 46973.790 | 33274.043 | 50347.029 |            |
| 30771.387 | 45872.280 | 75099.409 |           | 47149.019 | 33328.465 | 50366.915 |            |
| 30799.480 | 45905.706 | 75126.441 |           | 47282.433 | 33379.964 | 50391.463 |            |
| 30808.277 | 45925.788 | 75197.211 |           | 18108.725 | 33382.183 | 51414.549 |            |
| 30857.683 | 45928.350 | 75210.217 |           | 18115.393 | 43823.198 | 51464.465 |            |
| 30876.467 | 45945.619 | 75254.220 |           | 18120.801 | 43830.528 | 51613.523 |            |
| 35228.715 | 45963.911 | 75291.402 |           | 18131.178 | 43880.553 | 51635.241 |            |
| 35259.037 | 45978.199 | 75325.864 |           | 18147.996 | 43889.801 | 51711.694 |            |
| 35288.993 | 46047.892 | 75349.211 |           | 18175.216 | 43945.577 | 60712.677 |            |
| 35304.867 | 46048.789 | 75356.555 |           | 18178.902 | 43962.419 | 60788.392 |            |

**Table S7.** The CASSCF computed energy (cm<sup>-1</sup>) of the low lying spin-orbit states for complexes **1**, **2**, and **4**.

| Complex 1 | Complex 2 | Complex 4 |
|-----------|-----------|-----------|
| 0.000     | 0.000     | 0.000     |
| 0.000     | 2.386     | 0.000     |
| 44.462    | 42.233    | 44.122    |
| 44.462    | 48.228    | 44.122    |
| 144.579   | 157.180   | 72.850    |
| 144.579   | 176.558   | 72.850    |
| 183.828   | 234.502   | 85.383    |
| 183.828   | 272.181   | 85.383    |
| 246.009   | 292.166   | 233.499   |
| 246.009   | 311.292   | 233.499   |
| 282.214   | 322.264   | 251.698   |
| 282.214   | 458.891   | 251.698   |
| 363.743   | 461.487   | 352.192   |
| 363.743   |           | 352.192   |
| 527.444   |           | 389.348   |
| 527.444   |           | 389.348   |

**Table S8.** SINGLE\_ANISO computed  $g$ -values, tunneling gap  $\Delta_{tun}$  (for non KDs of Tb<sup>III</sup> in complex **2**) and the angle of deviation from ground state  $g_{zz}$  orientation of low-lying eight Kramers doublet for Er<sup>III</sup> ion in complex **4** respectively.

| Complex 2                                             |                          |                            |
|-------------------------------------------------------|--------------------------|----------------------------|
| $\pm M_J$ states (from 7 Septets+ 140 Quintets)       | $g_{xx}; g_{yy}; g_{zz}$ | $\Delta_{tun}$             |
| 0.000                                                 | 0.000; 0.000; 15.483     | 2.386                      |
| 42.233                                                | 0.000; 0.000; 12.736     | 5.995                      |
| 157.180                                               | 0.000; 0.000; 10.862     | 19.378                     |
| 272.181                                               | 0.000; 0.000; 13.324     | 19.985                     |
| 311.292                                               | 0.000; 0.000; 12.606     | 10.972                     |
| 458.891                                               | 0.000; 0.000; 17.217     | 2.596                      |
| Complex 4                                             |                          |                            |
| $\pm M_J$ states<br>(from 35 Quartets + 112 Doublets) | $g_{xx}; g_{yy}; g_{zz}$ | $\theta$ ( $^\circ$ angle) |
| 0.0                                                   | 0.311; 0.563; 15.156     | 0                          |
| 44.122                                                | 9.045; 7.062; 0.395      | 106.0                      |
| 72.850                                                | 0.391; 0.935; 5.882      | 113.0                      |
| 85.382                                                | 0.444; 7.237; 12.678     | 118.1                      |
| 233.499                                               | 9.416; 6.053; 1.016      | 38.0                       |
| 251.698                                               | 9.599; 6.085; 1.173      | 39.1                       |
| 352.192                                               | 0.837; 1.421; 14.383     | 67.3                       |
| 389.348                                               | 0.465; 1.695; 15.520     | 31.8                       |

**Table S9.** SINGLE\_ANISO computed wave function decomposition analysis for Dy(III) in complex **1**. The major dominating values are kept in bold.

| $\pm M_J$ | <i>wave function decomposition analysis</i>                                                                                                                                                |
|-----------|--------------------------------------------------------------------------------------------------------------------------------------------------------------------------------------------|
| KD1       | <b>78.9%</b> $ \pm 15/2\rangle$ + 10.6% $ \pm 11/2\rangle$ + 6.6 % $ \pm 7/2\rangle$ + 2.9 % $ \pm 5/2\rangle$                                                                             |
| KD2       | <b>53.4%</b> $ \pm 3/2\rangle$ + 46.2% $ \pm 1/2\rangle$ + 40.2% $ \pm 5/2\rangle$ + 31.4% $ \pm 7/2\rangle$ + 17.2% $ \pm 9/2\rangle$ + 8.2% $ \pm 11/2\rangle$                           |
| KD3       | <b>67.6%</b> $ \pm 13/2\rangle$ + 27.1% $ \pm 3/2\rangle$ + 24.0% $ \pm 9/2\rangle$ + 21.1% $ \pm 5/2\rangle$ + 17.0% $ \pm 7/2\rangle$                                                    |
| KD4       | <b>36.6%</b> $ \pm 7/2\rangle$ + 36.4% $ \pm 13/2\rangle$ + 28.2% $ \pm 9/2\rangle$ + 25.4% $ \pm 3/2\rangle$ + 25.3% $ \pm 1/2\rangle$ + 18.0% $ \pm 5/2\rangle$                          |
| KD5       | <b>55.0%</b> $ \pm 11/2\rangle$ + 38.7% $ \pm 3/2\rangle$ + 33.0% $ \pm 1/2\rangle$ + 28.5% $ \pm 5/2\rangle$ + 17.6% $ \pm 7/2\rangle$ + 11.8% $ \pm 9/2\rangle$ + 4.3% $ \pm 3/2\rangle$ |
| KD6       | <b>55.6%</b> $ \pm 9/2\rangle$ + 36.0% $ \pm 11/2\rangle$ + 31.6% $ \pm 13/2\rangle$ + 30.1% $ \pm 5/2\rangle$ + 18.8% $ \pm 3/2\rangle$ + 5.5% $ \pm 1/2\rangle$                          |
| KD7       | <b>22.8%</b> $ \pm 1/2\rangle$ + 26.6% $ \pm 5/2\rangle$ + 25.5% $ \pm 3/2\rangle$ + 3.1% $ \pm 7/2\rangle$                                                                                |
| KD8       | <b>49.0%</b> $ \pm 5/2\rangle$ + 47.9% $ \pm 3/2\rangle$ + 39.4% $ \pm 1/2\rangle$ + 8.0% $ \pm 13/2\rangle$ + 7.3% $ \pm 7/2\rangle$ + 4.6% $ \pm 9/2\rangle$ + 2.4% $ \pm 11/2\rangle$   |

**Table S10.** SINGLE\_ANISO computed wavefunction decomposition analysis for Tb(III) in complex **2**. The major dominating values are kept in bold.

| $\pm M_J$ | <i>wave function decomposition analysis</i>                                                                                                          |
|-----------|------------------------------------------------------------------------------------------------------------------------------------------------------|
| 1         | <b>55.3%</b> $ \pm 6\rangle$ + 33.9% $ \pm 4\rangle$ + 20.8 % $ \pm 5\rangle$ + 14.3% $ \pm 2\rangle$ + 14.3% $ \pm 2\rangle$ + 2.7% $ \pm 3\rangle$ |
| 2         | <b>55.2%</b> $ \pm 5\rangle$ + 36.0% $ \pm 3\rangle$ + 15.0% $ \pm 4\rangle$ + 12.3% $ \pm 1\rangle$                                                 |
| 3         | <b>43.6%</b> $ \pm 4\rangle$ + 35.3% $ \pm 2\rangle$ + 14.6% $ \pm 1\rangle$ + 5.4% $ \pm 3\rangle$                                                  |
| 4         | <b>49.9%</b> $ \pm 1\rangle$ + 34.6% $ \pm 3\rangle$ + 24.4% $ \pm 5\rangle$ + 21.3% $ \pm 4\rangle$ + 8.9% $ \pm 0\rangle$                          |
| 5         | <b>49.6%</b> $ \pm 3\rangle$ + 33.5% $ \pm 1\rangle$ + 29.3% $ \pm 5\rangle$ + 11.1% $ \pm 4\rangle$ + 16.2% $ \pm 2\rangle$ + 1.8% $ 0\rangle$      |
| 6         | <b>44.1%</b> $ \pm 2\rangle$ + 31.5% $ \pm 1\rangle$ + 27.1% $ \pm 4\rangle$ + 14.7% $ \pm 3\rangle$ + 6.5% $ \pm 6\rangle$ + 0.8% $ \pm 5\rangle$   |

**Table S11.** SINGLE\_ANISO computed wave function decomposition analysis for Er(III) in complex **4**. The major dominating values are kept in bold.

| $\pm M_J$ | <i>wave function decomposition analysis</i> |
|-----------|---------------------------------------------|
|           |                                             |

|     |                                                                                                                                            |
|-----|--------------------------------------------------------------------------------------------------------------------------------------------|
| KD1 | <b>54.8%</b>   $\pm 15/2$ ) + 35.6%   $\pm 11/2$ ) + 20.2%   $\pm 9/2$ ) + 15.6%   $\pm 5/2$ ) + 9.9%   $\pm 13/2$ ) + 5.5%   $\pm 7/2$ )  |
| KD2 | <b>40.6%</b>   $\pm 9/2$ ) + 34.2%   $\pm 13/2$ ) + 32.9%   $\pm 5/2$ ) + 17.8%   $\pm 3/2$ ) + 16.5%   $\pm 11/2$ ) + 6.7%   $\pm 7/2$ )  |
| KD3 | <b>39.9%</b>   $\pm 7/2$ ) + 38.8%   $\pm 13/2$ ) + 29.3%   $\pm 1/2$ ) + 21.1%   $\pm 11/2$ ) + 12.9%   $\pm 9/2$ ) + 12.9%   $\pm 9/2$ ) |
| KD4 | <b>44.6%</b>   $\pm 5/2$ ) + 37.7%   $\pm 3/2$ ) + 28.1%   $\pm 11/2$ ) + 27.0%   $\pm 13/2$ ) + 26.0%   $\pm 1/2$ ) + 14.0%   $\pm 9/2$ ) |
| KD5 | <b>48.2%</b>   $\pm 1/2$ ) + 37.8%   $\pm 3/2$ ) + 36.2%   $\pm 9/2$ ) + 23.1%   $\pm 11/2$ ) + 9.6%   $\pm 5/2$ )                         |
| KD6 | <b>30.2%</b>   $\pm 11/2$ ) + 29.0%   $\pm 1/2$ ) + 28.5%   $\pm 5/2$ ) + 5.9%   $\pm 3/2$ )                                               |
| KD7 | <b>34.1%</b>   $\pm 3/2$ ) + 32.0%   $\pm 5/2$ ) + 25.9%   $\pm 11/2$ ) + 16.3%   $\pm 7/2$ ) + 6.2%   $\pm 13/2$ )                        |
| KD8 | <b>52.5%</b>   $\pm 13/2$ ) + 45.4%   $\pm 11/2$ ) + 29.7%   $\pm 9/2$ ) + 19.6%   $\pm 5/2$ ) + 9.5%   $\pm 3/2$ )                        |

**Table S12.** SINGLE\_ANISO computed crystal field parameters for **1**, **2**, and **4**. The major components in the Table are in bold.

|          |          | <b>Complex 1</b> | <b>Complex 2</b> | <b>Complex 4</b> |
|----------|----------|------------------|------------------|------------------|
| <b>k</b> | <b>q</b> | $B_k^q$          | $B_k^q$          | $B_k^q$          |
| 2        | -2       | -0.19E+01        | <b>0.39E+01</b>  | 0.26E+00         |
|          | -1       | <b>0.80E+01</b>  | 0.59E+00         | -0.60E+00        |
|          | 0        | <b>-0.24E+01</b> | <b>-0.24E+01</b> | -0.32E+00        |
|          | 2        | <b>-0.41E+01</b> | -0.43E+00        | <b>0.19E+01</b>  |
|          | 1        | <b>-0.48E+01</b> | 0.19E+00         | -0.25E+00        |
| 4        | -4       | 0.49E-01         | 0.41E-01         | -0.26E-02        |
|          | -3       | 0.20E+01         | -0.15E+00        | -0.45E-01        |
|          | -2       | 0.10E+01         | -0.42E-01        | -0.81E-02        |
|          | -1       | -0.14E+01        | -0.15E-01        | -0.23E-01        |
|          | 0        | -0.45E+01        | 0.19E-02         | -0.90E-03        |
|          | 1        | 0.32E+00         | 0.45E-01         | 0.17E-01         |
|          | 2        | 0.52E+00         | 0.45E-01         | 0.18E-01         |
|          | 3        | 0.27E+00         | 0.55E-01         | -0.49E-01        |
|          | 4        | 0.13E+00         | -0.12E-01        | -0.13E-01        |
|          | -6       | -0.81E-03        | 0.11E-03         | 0.12E-03         |
|          | -5       | -0.17E-01        | 0.68E-03         | -0.13E-02        |

|   |    |           |           |           |
|---|----|-----------|-----------|-----------|
| 6 | -4 | 0.22E-02  | -0.63E-04 | -0.21E-03 |
|   | -3 | -0.25E-02 | 0.35E-03  | -0.53E-03 |
|   | -2 | 0.52E-03  | 0.51E-04  | -0.49E-03 |
|   | -1 | 0.39E-02  | -0.48E-04 | 0.31E-03  |
|   | 0  | 0.41E-03  | 0.21E-04  | -0.19E-04 |
|   | 1  | -0.52E-02 | -0.11E-04 | 0.31E-03  |
|   | 2  | -0.35E-02 | -0.23E-03 | -0.34E-04 |
|   | 3  | 0.12E-02  | -0.12E-03 | 0.19E-03  |
|   | 4  | -0.34E-02 | 0.63E-04  | 0.53E-04  |
|   | 5  | -0.18E-02 | -0.12E-03 | 0.32E-03  |
|   | 6  | 0.56E-02  | 0.44E-03  | 0.73E-04  |

**Table S13.** CASSCF computed LoProp charges on coordinated ligand atoms.

| Atoms | 1       | 2       | 4       |
|-------|---------|---------|---------|
| O1    | -0.7521 | -0.7432 | -0.7166 |
| O2    | -0.7052 | -0.7011 | -0.7201 |
| O3    | -0.7456 | -0.7441 | -0.7305 |
| O4    | -0.6961 | -0.7220 | -0.7565 |
| O5    | -0.7240 | -0.7211 | -0.7253 |
| O6    | -0.7164 | -0.7095 | -0.6934 |
| O7    | -0.6545 | -0.6564 | -0.6611 |

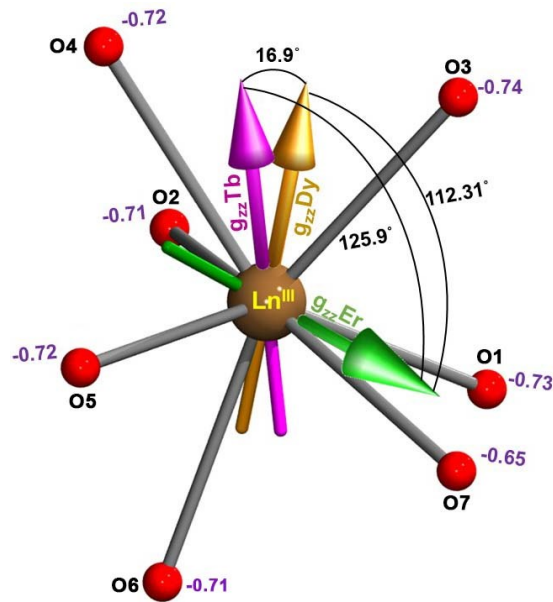

**Fig. S21.** Orientation of ground state  $g_{zz}$  axes on the Ln(III) ion in complexes **1**, **2**, and **4**. The purple values represent the average LoProp charges on the oxygen donor atoms.

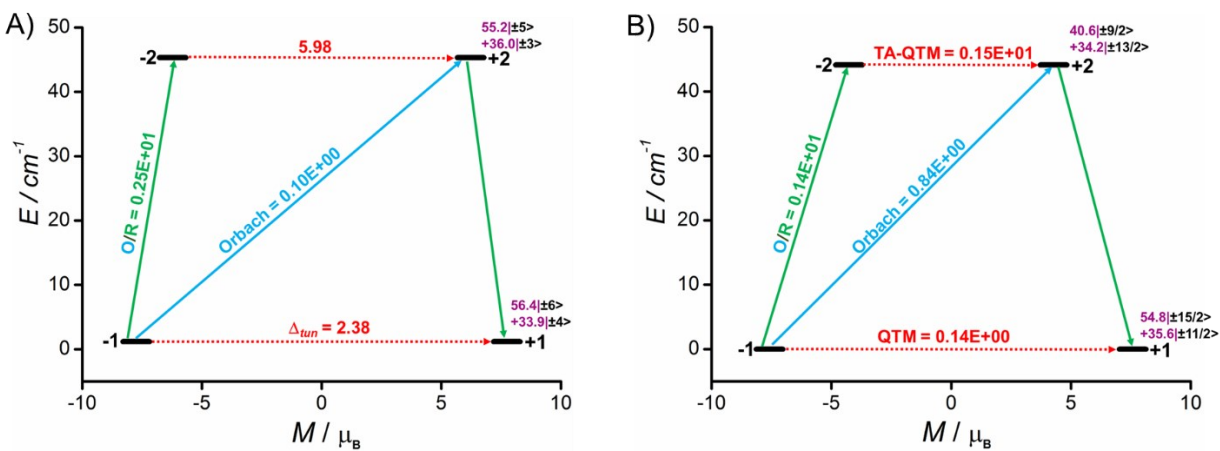

**Fig.S22.** The plausible magnetic relaxation mechanism in complexes **2** (A) and **4** (B). The red dotted arrows show the magnetic relaxation via QTM (between ground KDs) and TA-QTM (between excited state KDs) respectively in complex **4** while  $\Delta_{tun}$  represent the tunneling splitting between the non KDs in complex **2**. The green and sky blue arrows represent the magnetic relaxation through Orbach and Orbach/Raman processes. The purple characters represent the composition of  $M_J$  states.
